# Supplementary material
Source: publisher site journal article supplement (https://www.dovepress.com/article/586384)
Supplement: Supplementary file 1 [file Appendix.docx]

# Appendix

Appendix Table 1: Abbreviations and Names of the Working Groups Used for PharmGKB Clinical Guideline Annotations

| **Abbreviation of the Working Group** | **Name of the Working Group** |
| --- | --- |
| ACR | American College of Rheumatology |
| AIOM | Italian Association of Medical Oncology |
| AusNZ | Australian and New Zealand consensus guidelines |
| CFF | Cystic Fibrosis Foundation |
| CPNDS | Canadian Pharmacogenomics Network for Drug Safety |
| RNPGx | French National Network of Pharmacogenetics |
| SEFF | Spanish Pharmacogenetics and Pharmacogenomics Society |
| SEOM | Spanish Society of Medical Oncology |

**Notes:** These are the working groups with PGx-based clinical guidelines used in Clinical Guideline Annotations by PharmGKB, excluding CPIC and DPWG.

Appendix Table 2: ATC codes of PGx Substrates, Inhibitors, and Inducers, by Enzyme, Strength, and Systemic resp. Topical Administration

| **Enzyme** | **Category** | **Division** | **ATC Codes** |
| --- | --- | --- | --- |
| **OATP1B1** | **PGx substrate** | Total | ‘C10BA05’, ‘C10BX11’, ‘C10AA05’, ‘C10BX03’, ‘C10AA04’, ‘C10AA08’, ‘C10AA03’, ‘C10AA07’, ‘C10BA06’, ‘C10AA01’, ‘C10BA02’, ‘C10BA04’ |
| Systemic | ‘C10BA05’, ‘C10BX11’, ‘C10AA05’, ‘C10BX03’, ‘C10AA04’, ‘C10AA08’, ‘C10AA03’, ‘C10AA07’, ‘C10BA06’, ‘C10AA01’, ‘C10BA02’, ‘C10BA04’ |
| Topic | - |
| **Inhibitor** | Total | ‘J05AE08’, ‘J05AE30’, ‘J01FA09’, ‘S01XA18’, ‘L04AD01’, ‘L02BB06’, ‘B02BX05’, ‘C10AB04’, ‘J05AR10’, ‘J04AB02’, ‘J04AM05’, ‘J04AM02’, ‘J04AM06’, ‘J05AP55’, ‘J05AP56’, ‘L04AK02’ |
| Systemic | J05AE08’, ‘J05AE30’, ‘J01FA09’, ‘L04AD01’, ‘L02BB06’, ‘B02BX05’, ‘C10AB04’, ‘J05AR10’, ‘J04AB02’, J04AM05’, ‘J04AM02’, ‘J04AM06’, ‘J05AP55’, ‘J05AP56’, ‘L04AK02’ |
| Topic | ‘S01XA18’ |
| **BCRP** | **PGx substrate** | Total | ‘M04AA01’, ‘C10AA07’, ‘C10BA06’, ‘C10BA05’ |
| Systemic | ‘M04AA01’, ‘C10AA07’, ‘C10BA06’, ‘C10BA05’ |
| Topic | - |
| **Inhibitor** | Total | ‘L04AD01’, ‘S01XA18’, ‘L02BB06’, ‘B02BX05’, ‘M04AA03’, ‘J05AP56’, ‘L04AK02’ |
| Systemic | ‘L04AD01’, ‘L02BB06’, ‘B02BX05’, ‘M04AA03’, ‘J05AP56’, ‘L04AK02’ |
| Topic | ‘S01XA18’ |
| **CYP2B6** | **PGx substrate** | Total | ‘J05AG03’, ‘J05AR06’, ‘N06AB06’ |
| Systemic | ‘J05AG03’, ‘J05AR06’, ‘N06AB06’ |
| Topic | - |
| **Inhibitor** | Total | ‘B01AC04’, ‘J05AG03’, ‘J05AR06’, ‘B01AC22’, ‘N06AB06’, ‘L01AC01’, ‘J02AC03’ |
| Strong | ‘J02AC03’ |
| Moderate | ‘B01AC04’, ‘J05AG03’, ‘J05AR06’, ‘B01AC22’, ‘N06AB06’ |
| Weak | ‘L01AC01’ |
| Systemic | ‘B01AC04’, ‘J05AG03’, ‘J05AR06’, ‘B01AC22’, ‘N06AB06’, ‘L01AC01’, ‘J02AC03’ |
| Topic | - |
| **Inducer** | Total | ‘P01BF01’, ‘N03AF01’, ‘L01AA01’, ‘H02AB02’, ‘D07XB05’, ‘C05AA09’, ‘S01CA01’, ‘D07CB04’, ‘S01BA01’, ‘J05AR06’, ‘J05AG03’, ‘J02AC05’, ‘L01ED05’, ‘N02BB02’, ‘N06BA07’, ‘J05AG01’, ‘N03AA02’, ‘N03AB02’, ‘N03AA03’, ‘J04AM02’, ‘J04AB02’, ‘J04AM06’, ‘J04AM05’, ‘J05AR10’, ‘J05AE30’, ‘J05AE03’ |
| Strong | ‘N03AF01’, ‘N02BB02’, ‘N03AA02’, ‘N03AA03’ |
| Moderate | ‘P01BF01’, ‘L01AA01’, ‘H02AB02’, ‘D07XB05’, ‘C05AA09’, ‘S01CA01’, ‘D07CB04’, ‘S01BA01’, ‘J05AR06’, ‘J05AG03’, ‘N06BA07’, ‘J05AG01’, ‘J04AM02’, ‘J04AB02’, ‘J04AM06’, ‘J04AM05’, ‘J05AR10’, ‘J05AE30’, ‘J05AE03’ |
| Weak | ‘J02AC05’, ‘L01ED05’ |
| No category | ‘N03AB02’ |
| Systemic | ‘P01BF01’, ‘N03AF01’, ‘L01AA01’, ‘H02AB02’, ‘J05AR06’, ‘J05AG03’, ‘N02BB02’, ‘N06BA07’, ‘J05AG01’, ‘N03AA02’, ‘N03AB02’, ‘N03AA03’, ‘J04AM02’, ‘J04AB02’, ‘J04AM06’, ‘J04AM05’, ‘J05AR10’, ‘J05AE30’, ‘J05AE03’ |
| Topic | ‘D07XB05’, ‘C05AA09’, ‘S01CA01’, ‘D07CB04’, ‘S01BA01’ |
| Strong systemic | ‘N03AF01’, ‘N02BB02’, ‘N03AA02’, ‘N03AA03’ |
| Strong topic | - |
| Moderate systemic | ‘P01BF01’, ‘L01AA01’, ‘H02AB02’, ‘J05AR06’, ‘J05AG03’, ‘N06BA07’, ‘J05AG01’, ‘J04AM02’, ‘J04AB02’, ‘J04AM06’, ‘J04AM05’, ‘J05AR10’, ‘J05AE30’, ‘J05AE03’ |
| Moderate topic | ‘D07XB05’, ‘C05AA09’, ‘S01CA01’, ‘D07CB04’, ‘S01BA01’ |
| Weak systemic | ‘J02AC05’, ‘L01ED05’ |
| Weak topic | - |
| No category systemic | ‘N03AB02’ |
| No category topic | - |
| **CYP3A4/5** | **PGx substrate** | Total | ‘N05AH04’, ‘L04AD02’, ‘D11AH01’ |
| Systemic | ‘N05AH04’, ‘L04AD02’ |
| Topic | ‘D11AH01’ |
| **Inhibitor** | Total | ‘C01BD01’, ‘C08CA01’, ‘C09BB04’, ‘C10BX03’, ‘C09DB07’, ‘C09BX01’, ‘C10BX11’, ‘C09DB02’, ‘C09DX01’, ‘C09DB01’, ‘C09DB04’, ‘C09DX03’,‘A04AD12’, ‘J05AE08’, ‘B02BX05’, ‘N03AX24’, ‘L01ED02’, ‘L04AD01’, ‘S01XA18’, ‘J01MA02’, ‘S01AE03’, ‘J01FA09’, ‘N05BA09’, ‘L01ED01’, ‘J05AR18’, ‘J05AR09’, ‘J05AR22’, ‘V03AX03’, ‘J05AE10’, ‘L01EA02’, ‘G03AC09’, ‘G03AB05’, ‘G03AA09’, ‘C08DB01’, ‘J01AA02’, ‘C01BD07’, ‘J01FA01’, ‘D10AF02’, ‘G03AA15’, ‘G03AA16’, ‘G03AA10’, ‘G03AA13’, ‘G03AA07’, ‘G03AB05’, ‘G03AB06’, ‘J02AC01’, ‘N06AB03’, ‘N06AB08’, ‘J01CX01’, ‘S01AA13’, ‘D07CC01’, ‘D07CA01’, ‘D06AX01’, ‘G03AA10’, ‘L01EM01’, ‘L01EA01’, ‘J02AC05’, ‘J04AM02’, ‘J04AC01’, ‘J04AM06’, ‘J04AM05’, ‘J02AC02’, ‘R07AX02’, ‘R07AX30’, ‘R07AX31’, ‘R07AX32’, ‘J05AX18’, ‘D01AC08’, ‘J05AR10’, ‘D01AC52’, ‘A01AB09’, ‘D01AC02’, ‘D10AE51’, ‘G03XB01’, ‘C08CA05’, ‘A04AA05’, ‘L01EA03’, ‘A02BC01’, ‘J02AC04’, ‘N05AH04’, ‘L01EF02’, ‘J05AE03’, ‘J05AE30’, ‘A05BA03’, ‘L01XK03’, ‘L01EX02’, ‘C08DA01’, ‘C09BB10’, ‘J02AC03’ |
| Strong | ‘J05AE08’, ‘B02BX05’, ‘N03AX24’, ‘L01ED02’, ‘L04AD01’, ‘S01XA18’, ‘J01FA09’, ‘J05AR18’, ‘J05AR09’, ‘J05AR22’, ‘V03AX03’, ‘J05AE10’, ‘J01CX01’, ‘S01AA13’, ‘D07CC01’, ‘D07CA01’, ‘D06AX01’, ‘L01EM01’, ‘J02AC02’, ‘D01AC08’, ‘D01AC52’, ‘A01AB09’, ‘D01AC02’, ‘D10AE51’, ‘J02AC04’, ‘L01EF02’, ‘J05AE03’, ‘J05AE30’, ‘A05BA03’, ‘J02AC03’ |
| Moderate | ‘C01BD01’, ‘C08CA01’, ‘C09BB04’, ‘C10BX03’, ‘C09DB07’, ‘C09BX01’, ‘C10BX11’, ‘C09DB02’, ‘C09DX01’, ‘C09DB01’, ‘C09DB04’, ‘C09DX03’, ‘A04AD12’, ‘J01MA02’, ‘S01AE03’, ‘N05BA09’, ‘L01ED01’, ‘L01EA02’, ‘G03AC09’, ‘G03AB05’, ‘G03AA09’, ‘C08DB01’, ‘J01AA02’, ‘C01BD07’, ‘J01FA01’, ‘D10AF02’, ‘G03AA15’, ‘G03AA16’, ‘G03AA10’, ‘G03AA13’, ‘G03AA07’, ‘G03AB05’, ‘G03AB06’, ‘J02AC01’, ‘N06AB03’, ‘N06AB08’, ‘G03AA10’, ‘L01EA01’, ‘J02AC05’, ‘J04AM02’, ‘J04AC01’, ‘J04AM06’, ‘J04AM05’, ‘J05AX18’, ‘J05AR10’, ‘C08CA05’, ‘A04AA05’, ‘L01EA03’, ‘N05AH04’, ‘L01EX02’, ‘C08DA01’, ‘C09BB10’ |
| Weak | ‘R07AX02’, ‘R07AX30’, ‘R07AX31’, ‘R07AX32’, ‘G03XB01’, ‘A02BC01’, ‘L01XK03’ |
| Systemic | ‘C01BD01’, ‘C08CA01’, ‘C09BB04’, ‘C10BX03’, ‘C09DB07’, ‘C09BX01’, ‘C10BX11’, ‘C09DB02’, ‘C09DX01’, ‘C09DB01’, ‘C09DB04’, ‘C09DX03’,‘A04AD12’, ‘J05AE08’, ‘B02BX05’, ‘N03AX24’, ‘L01ED02’, L04AD01’, ‘J01MA02’, ‘J01FA09’, ‘N05BA09’, ‘L01ED01’, ‘J05AR18’, ‘J05AR09’, ‘J05AR22’, ‘V03AX03’, ‘J05AE10’, ‘L01EA02’, ‘G03AC09’, ‘G03AB05’, ‘G03AA09’, ‘C08DB01’, ‘J01AA02’, ‘C01BD07’, ‘J01FA01’, ‘G03AA15’, ‘G03AA16’, ‘G03AA10’, ‘G03AA13’, ‘G03AA07’, ‘G03AB05’, ‘G03AB06’, ‘J02AC01’, ‘N06AB03’, ‘N06AB08’, ‘J01CX01’, ‘G03AA10’, ‘L01EM01’, ‘L01EA01’, ‘J02AC05’, ‘J04AM02’, ‘J04AC01’, ‘J04AM06’, ‘J04AM05’, ‘J02AC02’, ‘R07AX02’, ‘R07AX30’, ‘R07AX31’, ‘R07AX32’, ‘J05AX18’, ‘J05AR10’, ‘G03XB01’, ‘C08CA05’, ‘A04AA05’, ‘L01EA03’, ‘A02BC01’, ‘J02AC04’, ‘N05AH04’, ‘L01EF02’, ‘J05AE03’, J05AE30’, ‘A05BA03’, ‘L01XK03’, ‘L01EX02’, ‘C08DA01’, ‘C09BB10’, ‘J02AC03’ |
| Topic | ‘S01XA18’, ‘S01AE03’, ‘D10AF02’, ‘S01AA13’, ‘D07CC01’, ‘D07CA01’, ‘D06AX01’, ‘D01AC08’, ‘D01AC52’, ‘A01AB09’, ‘D01AC02’, ‘D10AE51’ |
| Strong systemic | ‘J05AE08’, ‘B02BX05’, ‘N03AX24’, ‘L01ED02’, L04AD01’, ‘J01FA09’, ‘J05AR18’, ‘J05AR09’, ‘J05AR22’, ‘V03AX03’, ‘J05AE10’, ‘J01CX01’, ‘L01EM01’, ‘J02AC02’, ‘J02AC04’, ‘L01EF02’, ‘J05AE03’, J05AE30’, ‘A05BA03’, ‘J02AC03’ |
| Strong topic | ‘S01XA18’, ‘S01AA13’, ‘D07CC01’, ‘D07CA01’, ‘D06AX01’, ‘D01AC08’, ‘D01AC52’, ‘A01AB09’, ‘D01AC02’, ‘D10AE51’ |
| Moderate systemic | ‘C01BD01’, ‘C08CA01’, ‘C09BB04’, ‘C10BX03’, ‘C09DB07’, ‘C09BX01’, ‘C10BX11’, ‘C09DB02’, ‘C09DX01’, ‘C09DB01’, ‘C09DB04’, ‘C09DX03’,‘A04AD12’, ‘J01MA02’, ‘N05BA09’, ‘L01ED01’, ‘L01EA02’, ‘G03AC09’, ‘G03AB05’, ‘G03AA09’, ‘C08DB01’, ‘J01AA02’, ‘C01BD07’, ‘J01FA01’, ‘G03AA15’, ‘G03AA16’, ‘G03AA10’, ‘G03AA13’, ‘G03AA07’, ‘G03AB05’, ‘G03AB06, ‘J02AC01’, ‘N06AB03’, ‘N06AB08’, ‘G03AA10’, ‘L01EA01’, ‘J02AC05’, ‘J04AM02’, ‘J04AC01’, ‘J04AM06’, ‘J04AM05’, ‘J05AX18’, ‘J05AR10’, ‘C08CA05’, ‘A04AA05’, ‘L01EA03’, ‘N05AH04’, ‘L01EX02’, ‘C08DA01’, ‘C09BB10’ |
| Moderate topic | ‘S01AE03’, ‘D10AF02’ |
| Weak systemic | ‘R07AX02’, ‘R07AX30’, ‘R07AX31’, ‘R07AX32’, ‘G03XB01’, ‘A02BC01’, ‘L01XK03’ |
| Weak topic | - |
| **Inducer** | Total | ‘L02BB05’, ‘H02AB01’, ‘D07XC01’, ‘D07AC01’, ‘D07CC01’, ‘C02KX01’, ‘L01ED04’, ‘N03AF01’, ‘N03AX25’, ‘L01AA01’, ‘L01EC02’, ‘H02AB02’, ‘D07XB05’, ‘C05AA09’, ‘S01CA01’, ‘D07CB04’, ‘S01BA01’, ‘J05AG03’, ‘J05AR06’, ‘J05AR18’, ‘J05AR09’, ‘L02BB04’, ‘J05AG04’, ‘N06AX25’, ‘N03AX10’, ‘L01AA06’, ‘L01XM02’, ‘L01ED05’, ‘R07AX30’, ‘N02BB02’, ‘H02BX01’, ‘H02AB04’, ‘D07AC14’, ‘L01XX23’, ‘N06BA07’, ‘J05AG01’, ‘N03AF02’, ‘N03AX22’, ‘N03AA02’, ‘N03AB02’, ‘A10BG03’, ‘A10BD05’, ‘N03AA03’, ‘D07XA02’, ‘D01AC20’, ‘S01BA04’, ‘C05AA04’, ‘H02AB06’, ‘H02AB07’, ‘J04AB04’, ‘J04AB02’, ‘J04AM05’, ‘J04AM02’, ‘J04AM06’, ‘N03AF03’, ‘L01EC01’, ‘L01CA01’, ‘L01EL03’ |
| Strong | ‘L02BB05’, ‘N03AF01’, ‘L02BB04’, ‘N06AX25’, ‘N03AX10’, ‘L01XM02’, ‘R07AX30’, ‘N02BB02’, ‘L01XX23’, ‘J04AB02’, ‘J04AM05’, ‘J04AM02’, ‘J04AM06’ |
| Moderate | ‘C02KX01’, ‘N03AX25’, ‘L01AA01’, ‘L01EC02’, ‘H02AB02’, ‘D07XB05’, ‘C05AA09’, ‘S01CA01’, ‘D07CB04’, ‘S01BA01’, ‘J05AG03’, ‘J05AR06’, ‘J05AR18’, ‘J05AR09’, ‘J05AG04’, ‘L01AA06’, ‘L01ED05’, ‘J05AG01’, ‘N03AF02’, ‘N03AX22’, ‘N03AA02’, ‘N03AB02’, ‘N03AA03’, ‘L01CA01’ |
| Weak | ‘H02AB01’, ‘D07XC01’, ‘D07AC01’, ‘D07CC01’, ‘L01ED04’, ‘H02BX01’, ‘H02AB04’, ‘D07AC14’, ‘N06BA07’, ‘A10BG03’, ‘A10BD05’, ‘D07XA02’, ‘D01AC20’, ‘S01BA04’, ‘C05AA04’, ‘H02AB06’, ‘H02AB07’, ‘J04AB04’, ‘N03AF03’, ‘L01EC01’, ‘L01EL03’ |
| Systemic | ‘L02BB05’, ‘H02AB01’, ‘C02KX01’, ‘L01ED04’, ‘N03AF01’, ‘N03AX25’, ‘L01AA01’, ‘L01EC02’, ‘H02AB02’, ‘J05AG03’, ‘J05AR06’, ‘J05AR18’, ‘J05AR09’, ‘L02BB04’, ‘J05AG04’, ‘N06AX25’, ‘N03AX10’, ‘L01AA06’, ‘L01XM02’, ‘L01ED05’, ‘R07AX30’, ‘N02BB02’, ‘H02BX01’, ‘H02AB04’, ‘L01XX23’, ‘N06BA07’, ‘J05AG01’, ‘N03AF02’, ‘N03AX22’, ‘N03AA02’, ‘N03AB02’, ‘A10BG03’, ‘A10BD05’, ‘N03AA03’, ‘H02AB06’, ‘H02AB07’, ‘J04AB04’, ‘J04AB02’, ‘J04AM05’, ‘J04AM02’, ‘J04AM06’, ‘N03AF03’, ‘L01EC01’, ‘L01CA01’, L01EL03’ |
| Topic | ‘D07XC01’, ‘D07AC01’, ‘D07CC01’, ‘D07XB05’, ‘C05AA09’, ‘S01CA01’, ‘D07CB04’, ‘S01BA01’, ‘D07AC14’, ‘D07XA02’, ‘D01AC20’, ‘S01BA04’, ‘C05AA04’ |
| Strong systemic | ‘L02BB05’, ‘N03AF01’, ‘L02BB04’, ‘N06AX25’, ‘N03AX10’, ‘L01XM02’, ‘R07AX30’, ‘N02BB02’, ‘L01XX23’, ‘J04AB02’, ‘J04AM05’, ‘J04AM02’, ‘J04AM06’ |
| Strong topic |  |
| Moderate systemic | ‘C02KX01’, ‘N03AX25’, ‘L01AA01’, ‘L01EC02’, ‘H02AB02’, ‘J05AG03’, ‘J05AR06’, ‘J05AR18’, ‘J05AR09’, ‘J05AG04’, ‘L01AA06’, ‘L01ED05’, ‘J05AG01’, ‘N03AF02’, ‘N03AX22’, ‘N03AA02’, ‘N03AB02’, ‘N03AA03’, ‘L01CA01’ |
| Moderate topic | ‘D07XB05’, ‘C05AA09’, ‘S01CA01’, ‘D07CB04’, ‘S01BA01’ |
| Weak systemic | ‘H02AB01’, ‘L01ED04’, ‘H02BX01’, ‘H02AB04’, ‘N06BA07’, ‘A10BG03’, ‘A10BD05’, ‘H02AB06’, ‘H02AB07’, ‘J04AB04’, ‘N03AF03’, ‘L01EC01’, L01EL03’ |
| Weak topic | ‘D07XC01’, ‘D07AC01’, ‘D07CC01’, ‘D07AC14’, ‘D07XA02’, ‘D01AC20’, ‘S01BA04’, ‘C05AA04’ |

Abbreviations: PGx, pharmacogenetics; OATP1B1, organic anion transporting polypeptide 1B1; BCRP, breast cancer resistance protein; ATC, Anatomical Therapeutic Chemical.
